# Supplementary material for: A Hybrid Approach for Improving Image Segmentation: Application to Phenotyping of Wheat Leaves
Source: PubMed Central journal article supplement (PMC5167398; doi:10.1371/journal.pone.0168496), 2016-12-19
Supplement: pone.0168496.s001.pdf [file pone.0168496.s001.pdf]

# A Hybrid Approach for Improving Image Segmentation: Application to Phenotyping of Wheat Leaves

Joshua Chopin, Hamid Laga, Stanley J Miklavcic

## S1 Appendix

### Curvature calculations for control point detection

Let  $C$  be the initial contour and  $C_s$  be a smoothed version of the contour, then

$$C_s^i = \omega_r \sum_{k=-r}^{k=r} C^{i+k} \tag{S1}$$

where  $i = 1 : N$  are the  $N$  points of the contour,  $r$  is the width of the moving average and  $\omega_r$  is a one dimensional gaussian window of width  $r$ . Finally, the curvature,  $\kappa_i^j$ , of contour  $j$  at point  $i$  is calculated as

$$\kappa_i^j = \frac{|(x_i^j)'(y_i^j)'' - (y_i^j)'(x_i^j)''|}{((x_i^j)'^2 + (y_i^j)'^2)^{\frac{3}{2}}} \tag{S2}$$

where the derivatives are calculated using a fourth order approximation, *i.e.*

$$(x_i^j)' = \frac{1}{12}(-x_{i+2}^j + 8x_{i+1}^j - 8x_{i-1}^j + x_{i-2}^j). \tag{S3}$$

### Calculating the corner metric

Firstly we compute the second-moment matrix, or structure tensor, which is given as

$$A = \begin{pmatrix} I_x^2 & I_x I_y \\ I_x I_y & I_y^2 \end{pmatrix}, \tag{S4}$$

where  $I_x$  and  $I_y$  are the derivatives of the image in the  $x$  and  $y$  direction respectively.

Then the value returned by the corner detector,  $H$  is

$$H = \det(A) - \kappa \cdot \text{trace}(A). \tag{S5}$$

## Mathematical formulation of snakes

The original formulation of snakes states that for a planar curve parameterized by arc length  $C : [0, 1] \rightarrow \mathbb{R}^2, q \mapsto (x(q), y(q))$ , the following energy should be minimized,

$$E(C) = \alpha \int_0^1 |C'(q)|^2 dq + \beta \int_0^1 |C''(q)|^2 dq - \lambda \int_0^1 |\nabla I_G(C(q))|^2 dq, \tag{S6}$$

where  $\nabla I_G = (\nabla I * G)$  is the gradient of the image  $I$ , smoothed with a Gaussian kernel of parameter  $\sigma$  and the weights  $\alpha, \beta$  and  $\lambda$  are real positive scalar parameters that define the importance of each of the three terms.

To numerically solve the functional in Equation S6 we again follow the approach of Kass et. al [1] who use the following pair of evolution equations

$$\begin{aligned} \mathbf{x}_t &= (\mathbf{A} + \gamma \mathbf{I})^{-1} (\gamma \mathbf{x}_{t-1} - \lambda \mathbf{f}_x(\mathbf{x}_{t-1}, \mathbf{y}_{t-1})) \\ \mathbf{y}_t &= (\mathbf{A} + \gamma \mathbf{I})^{-1} (\gamma \mathbf{y}_{t-1} - \lambda \mathbf{f}_y(\mathbf{x}_{t-1}, \mathbf{y}_{t-1})), \end{aligned} \tag{S7}$$

where bolded variables represent matrices or vectors. Here  $(\mathbf{x}_t, \mathbf{y}_t)$  are vectors containing the  $x$  and  $y$  coordinates of the contour at time  $t$ ,  $\mathbf{A}$  is a tridiagonal matrix containing the parameter  $\alpha$  and is used for approximating contour derivatives. It is defined as follows,

$$A(i, j) = \begin{cases} 2\alpha & \text{if } i = j \\ -\alpha & \text{if } i = (j - 1) \text{ or } (j + 1) \\ 0 & \text{otherwise} \end{cases} \tag{S8}$$

$\gamma$  is a step size,  $\mathbf{I}$  is an identity matrix the same size as  $\mathbf{A}$  and  $\mathbf{f}_x$  and  $\mathbf{f}_y$  are matrices containing the  $x$  and  $y$  partial derivatives of the external vector field, respectively.

The snakes formulation seeks to minimize the energy defined above by finding a trade-off between contour smoothness and distance to image edges. As a result of the contour being constrained to smoothness, sharp corners are often rounded off and not captured. To modify this model for evolving open arcs with fixed endpoints we simply

change the matrix  $A$  to

$$A(i, j) = \begin{cases} 1 & \text{if } i = 1 \text{ or } j = N \\ 2\alpha & \text{if } i = j \\ -\alpha & \text{if } i = (j - 1) \text{ or } (j + 1) \\ 0 & \text{otherwise.} \end{cases} \quad (S9)$$

Where each open snake will correspond to a leaf edge, and the fixed endpoints will correspond to leaf features such as corners, axils, or twists in the leaf.

### Results of the algorithm applied to a larger data set

The following tables give results of analyses of 4 further images of each of the types represented in Figure 7 of the paper.

|                   |        | GMM      | K-means    | MHT        |            |        | GMM      | K-means    | MHT        |
|-------------------|--------|----------|------------|------------|------------|--------|----------|------------|------------|
| SDI               | Before | 0.87     | 0.77       | 0.70       | SDI        | Before | 0.79     | 0.73       | 0.63       |
|                   | After  | 0.88     | 0.77       | 0.75       |            | After  | 0.81     | 0.80       | 0.74       |
| Tip distance (px) | Before | 53 (±58) | 137 (±124) | 112 (±137) | Tip d (px) | Before | 22 (±13) | 124 (±156) | 131 (±169) |
|                   | After  | 11 (±15) | 67 (±59)   | 67 (±75)   |            | After  | 16 (±11) | 78 (±101)  | 81 (±95)   |
| Breakages         | Before | 8        | 13         | 13         | Breakages  | Before | 8        | 13         | 14         |
|                   | After  | 3        | 4          | 7          |            | After  | 3        | 4          | 4          |

|                   |        | GMM      | K-means  | MHT        |                   |        | GMM      | K-means  | MHT        |
|-------------------|--------|----------|----------|------------|-------------------|--------|----------|----------|------------|
| SDI               | Before | 0.79     | 0.77     | 0.49       | SDI               | Before | 0.71     | 0.77     | 0.54       |
|                   | After  | 0.84     | 0.84     | 0.61       |                   | After  | 0.68     | 0.77     | 0.68       |
| Tip distance (px) | Before | 39 (±44) | 73 (±53) | 145 (±216) | Tip distance (px) | Before | 66 (±57) | 60 (±51) | 315 (±262) |
|                   | After  | 14 (±15) | 18 (±23) | 48 (±79)   |                   | After  | 49 (±31) | 49 (±32) | 121 (±164) |
| Breakages         | Before | 11       | 11       | 17         | Breakages         | Before | 8        | 10       | 17         |
|                   | After  | 4        | 6        | 9          |                   | After  | 6        | 6        | 11         |

**S1 Table. Our algorithm applied to four images of type 1: plant groups with a complex background (Figure 7(a)).**

|                   |        | GMM              | K-means         | MHT              |                   |        | GMM             | K-means         | MHT              |
|-------------------|--------|------------------|-----------------|------------------|-------------------|--------|-----------------|-----------------|------------------|
| SDI               | Before | 0.54             | 0.88            | 0.73             | SDI               | Before | 0.86            | 0.93            | 0.65             |
|                   | After  | 0.56             | 0.87            | 0.76             |                   | After  | 0.88            | 0.92            | 0.73             |
| Tip distance (px) | Before | 137 ( $\pm 48$ ) | 97 ( $\pm 58$ ) | 135 ( $\pm 37$ ) | Tip distance (px) | Before | 50 ( $\pm 48$ ) | 31 ( $\pm 30$ ) | 96 ( $\pm 105$ ) |
|                   | After  | 111 ( $\pm 45$ ) | 52 ( $\pm 19$ ) | 73 ( $\pm 35$ )  |                   | After  | 19 ( $\pm 23$ ) | 11 ( $\pm 16$ ) | 59 ( $\pm 72$ )  |
| Breakages         | Before | 3                | 3               | 2                | Breakages         | Before | 3               | 3               | 7                |
|                   | After  | 0                | 0               | 1                |                   | After  | 1               | 1               | 3                |

|                   |        | GMM             | K-means         | MHT             |                   |        | GMM             | K-means         | MHT             |
|-------------------|--------|-----------------|-----------------|-----------------|-------------------|--------|-----------------|-----------------|-----------------|
| SDI               | Before | 0.94            | 0.92            | 0.80            | SDI               | Before | 0.74            | 0.87            | 0.68            |
|                   | After  | 0.93            | 0.92            | 0.84            |                   | After  | 0.82            | 0.89            | 0.79            |
| Tip distance (px) | Before | 37 ( $\pm 23$ ) | 28 ( $\pm 38$ ) | 56 ( $\pm 54$ ) | Tip distance (px) | Before | 77 ( $\pm 77$ ) | 24 ( $\pm 20$ ) | 86 ( $\pm 82$ ) |
|                   | After  | 13 ( $\pm 9$ )  | 13 ( $\pm 15$ ) | 21 ( $\pm 24$ ) |                   | After  | 41 ( $\pm 48$ ) | 19 ( $\pm 19$ ) | 53 ( $\pm 46$ ) |
| Breakages         | Before | 4               | 5               | 7               | Breakages         | Before | 11              | 13              | 19              |
|                   | After  | 0               | 2               | 2               |                   | After  | 5               | 4               | 10              |

**S2 Table. Our algorithm applied to four images of type 2: individual plants without frame support (Figure 7(b)).**

|                      |        | GMM             | K-means         | MHT             |                      |        | GMM             | K-means         | MHT             |
|----------------------|--------|-----------------|-----------------|-----------------|----------------------|--------|-----------------|-----------------|-----------------|
| SDI                  | Before | 0.7             | 0.78            | 0.62            | SDI                  | Before | 0.88            | 0.51            | 0.63            |
|                      | After  | 0.76            | 0.84            | 0.68            |                      | After  | 0.91            | 0.69            | 0.74            |
| Tip distance<br>(px) | Before | 57 ( $\pm 45$ ) | 33 ( $\pm 31$ ) | 45 ( $\pm 28$ ) | Tip distance<br>(px) | Before | 13 ( $\pm 10$ ) | 73 ( $\pm 50$ ) | 68 ( $\pm 34$ ) |
|                      | After  | 36 ( $\pm 19$ ) | 24 ( $\pm 15$ ) | 29 ( $\pm 16$ ) |                      | After  | 9 ( $\pm 10$ )  | 24 ( $\pm 29$ ) | 29 ( $\pm 21$ ) |
| Breakages            | Before | 6               | 9               | 13              | Breakages            | Before | 4               | 5               | 9               |
|                      | After  | 1               | 3               | 3               |                      | After  | 0               | 0               | 2               |

|                      |        | GMM           | K-means         | MHT             |                      |        | GMM             | K-means         | MHT             |
|----------------------|--------|---------------|-----------------|-----------------|----------------------|--------|-----------------|-----------------|-----------------|
| SDI                  | Before | 0.87          | 0.69            | 0.66            | SDI                  | Before | 0.78            | 0.77            | 0.63            |
|                      | After  | 0.87          | 0.71            | 74              |                      | After  | 0.81            | 0.82            | 0.70            |
| Tip distance<br>(px) | Before | 8 ( $\pm 5$ ) | 32 ( $\pm 27$ ) | 44 ( $\pm 25$ ) | Tip distance<br>(px) | Before | 27 ( $\pm 30$ ) | 33 ( $\pm 51$ ) | 71 ( $\pm 98$ ) |
|                      | After  | 7 ( $\pm 3$ ) | 17 ( $\pm 18$ ) | 19 ( $\pm 23$ ) |                      | After  | 11 ( $\pm 19$ ) | 19 ( $\pm 30$ ) | 50 ( $\pm 55$ ) |
| Breakages            | Before | 2             | 14              | 12              | Breakages            | Before | 7               | 11              | 14              |
|                      | After  | 2             | 6               | 8               |                      | After  | 4               | 4               | 6               |

**S3 Table. Our algorithm applied to four images of type 3: individual plants with frame support (Figure 7(c)).**

## References

1. Kass M, Witkin A, Terzopoulos D. Snakes: Active contour models. International Journal of Computer Vision. 1988;1(4):321–331.
